# Supplementary material for: The low-density lipoprotein receptor–mTORC1 axis coordinates CD8+ T cell activation
Source: PubMed Central journal article supplement — J Cell Biol. 2022 Sep 21;221(11):e202202011. doi: 10.1083/jcb.202202011 (PMC9499829; doi:10.1083/jcb.202202011), 2022-09-21

In the next slide, two images of the same gel are provided:

- Image 1 has been acquired under the chemiluminescent channel (for HRP and AP chemiluminescent substrate), used for band quantification and representation of the abundance of the selected proteins;
- Image 2 has been acquired in the visible channel (excitation at 685 for protein detection), that allows to appreciate molecular weights (first line)

$\beta$ -actin (MW 46 kDa)

SDS gel 10% - loaded 20  $\mu$ g protein/sample

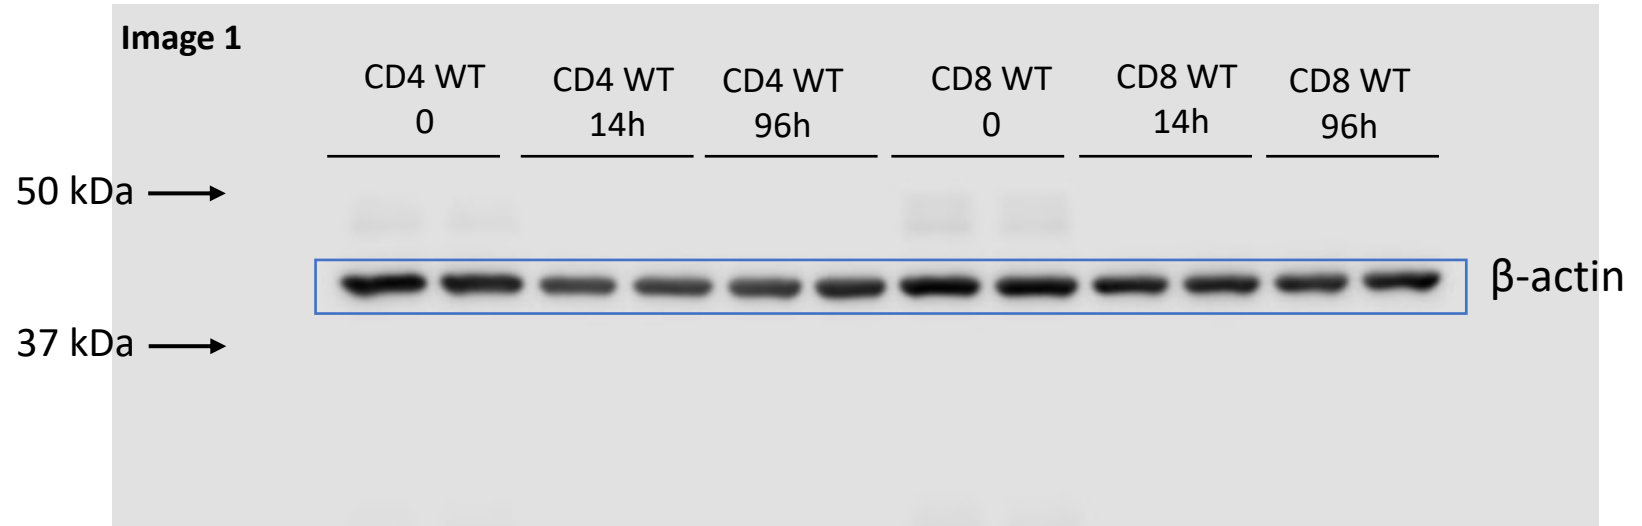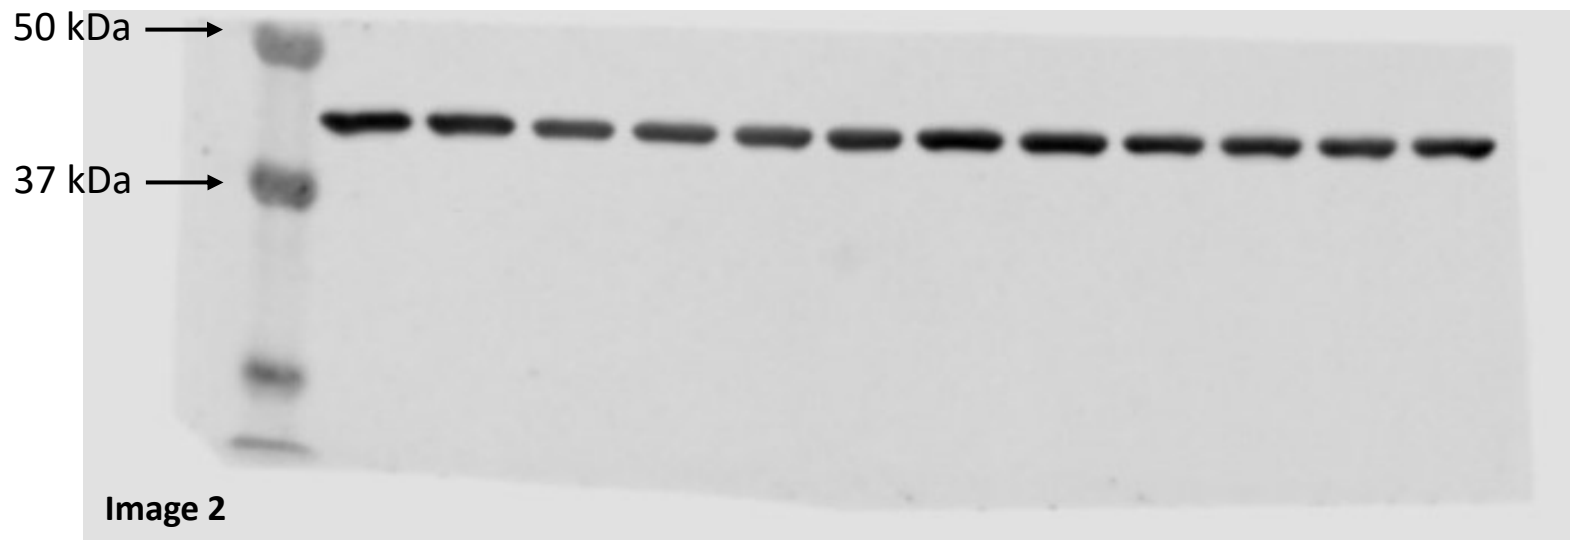

In the next slide, two images of the same gel are provided:

- Image 1 has been acquired under the chemiluminescent channel (for HRP and AP chemiluminescent substrate), used for band quantification and representation of the abundance of the selected proteins;
- Image 2 has been acquired in the visible channel (excitation at 685 for protein detection), that allows to appreciate molecular weights (first line)

LDLR (MW 100-150 kDa)

SDS gel 10% - loaded 20 µg protein/sample

Image 1

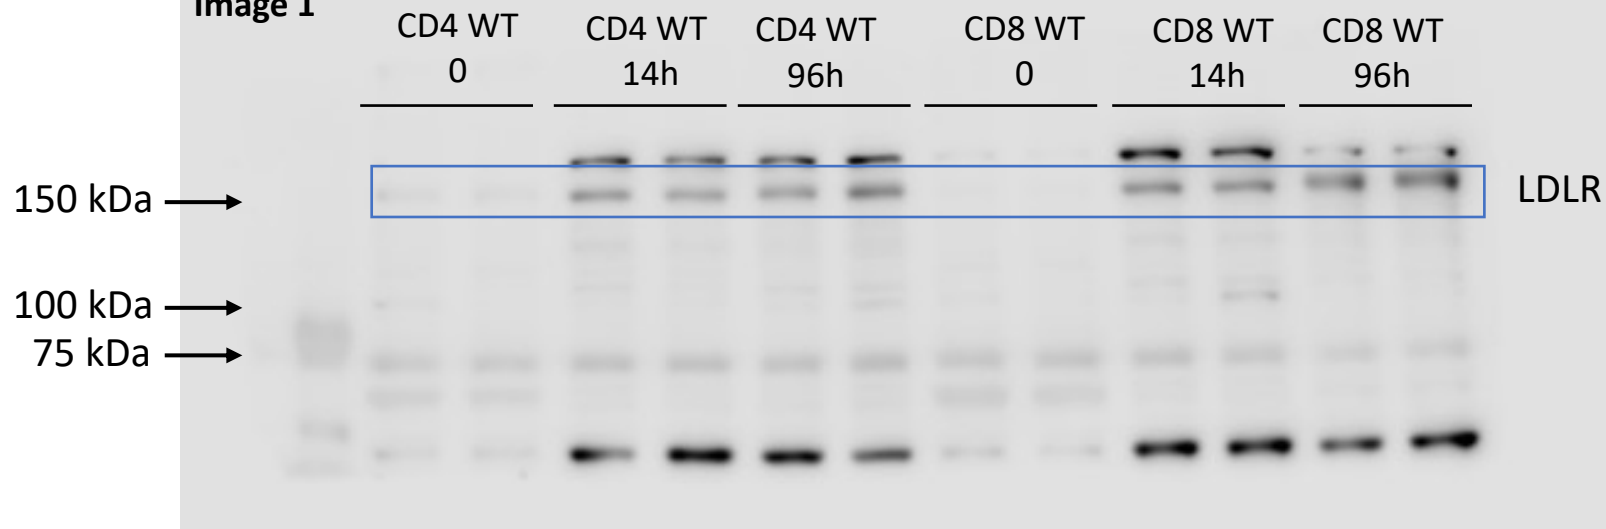

Image 2

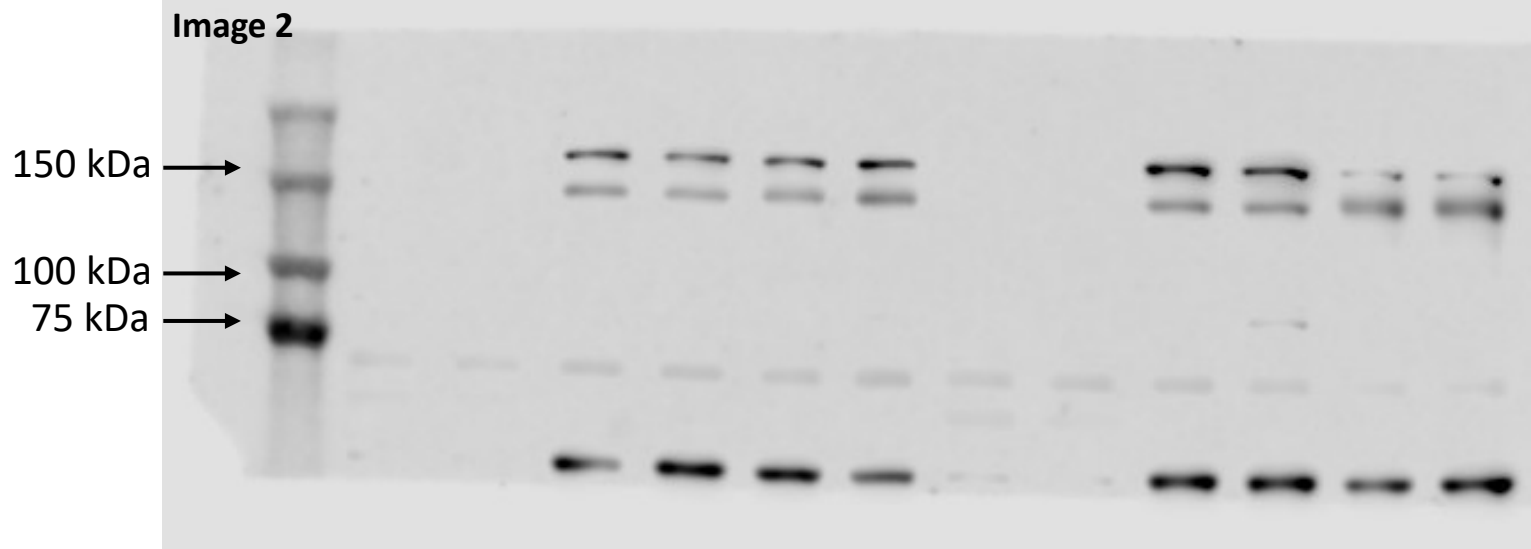

Supplement: JCB_202202011_SourceDataF3.pdf [file JCB_202202011_SourceDataF3.pdf]
